# Supplementary material for: Molecular Rapid Diagnostics Improve Time to Effective Therapy and Survival in Patients with Vancomycin-Resistant Enterococcus Bloodstream Infections
Source: MDPI journal article supplement (doi:10.3390/antibiotics12020210), 2023-01-19
Supplement: s1 [file s1]

**Table S1.** VRE Rates from 2013 to 2017

| Year                  | VRE rates per 1,000 Enterococcal spp. isolates |
|-----------------------|------------------------------------------------|
| 12/31/2016-12/31/2017 | 75.1                                           |
| 12/31/2015-12/31/2016 | 90.9                                           |
| 12/31/2014-12/31/2015 | 83.5                                           |
| 12/31/2013-12/31/2014 | 96.6                                           |

VRE: vancomycin resistant *Enterococcus* spp. Rates are computed per 1,000 *Enterococcus* spp. isolates within the four community hospitals over each respective year. *Enterococcus gallinarum* was excluded.

**Table S2.** ASP Staffing on Time to Optimal Therapy by Implementation Group

|                                              | <b>Fully Staffed</b> | <b>Not Fully Staffed</b> | <b><i>P</i></b> |
|----------------------------------------------|----------------------|--------------------------|-----------------|
| Pre-Implementation, median (IQR) TOT (n=50)  | 43.7 (10.1-62.8)     | 54.1 (38.6-64.0)         | 0.190           |
| Post-Implementation, median (IQR) TOT (n=54) | 20.1 (5.7-50.2)      | 12.3 (5.4-32.4)          | 0.332           |

ASP: Antimicrobial stewardship program; IQR: interquartile range; TOT: time to optimal therapy

**Table S3.** Demographics and Baseline Characteristics of Survivors vs. Non-Survivors

| <b>Characteristic</b>                                                   | <b>Survivors</b> | <b>Non-Survivors</b> | <b>P</b> |
|-------------------------------------------------------------------------|------------------|----------------------|----------|
| Age (years), median (IQR)                                               | 57.0 (44.8-82.7) | 54.5 (46.8-74.0)     | 0.650    |
| Sex (male), n (%)                                                       | 47 (57.3)        | 16 (72.7)            | 0.189    |
| ICU admission, n (%)                                                    | 44 (53.7)        | 20 (90.9)            | 0.001    |
| PBS, median (IQR)                                                       | 1.0 (0-3.25)     | 5.0 (2.75-6.0)       | <0.001   |
| High-risk, n (%)                                                        |                  |                      |          |
| HSCT recipient                                                          | 27 (32.9)        | 9 (40.9)             | 0.485    |
| Active malignancies                                                     | 7 (8.5)          | 2 (9.1)              | 0.935    |
| Solid organ transplant                                                  | 6 (7.3)          | 1 (4.5)              | 0.645    |
| Neutropenia (ANC < 500 cells/mm <sup>3</sup> )                          | 22 (26.8)        | 10 (45.5)            | 0.120    |
| Infection sources, n (%)                                                |                  |                      | 0.302    |
| Gastrointestinal/intra-abdominal                                        | 49 (59.8)        | 14 (63.6)            |          |
| Catheter-related                                                        | 11 (13.4)        | 5 (22.7)             |          |
| Skin and skin structure                                                 | 6 (7.3)          | 2 (9.1)              |          |
| Urinary/genitourinary                                                   | 10 (12.2)        | 1 (4.5)              |          |
| Unknown                                                                 | 6 (7.3)          | 0 (0)                |          |
| <b>Outcomes</b>                                                         |                  |                      |          |
| Median (IQR) time (hours) from GS to antimicrobial therapy optimization | 24.2 (7.1-51.6)  | 54.1 (32.4-63.4)     | <0.001   |
| VRE Coverage at 24 hours from GS, n (%)                                 | 47 (57.3)        | 6 (27.3)             | 0.012    |

IQR: Interquartile range; ICU: intensive care unit; ANC: absolute neutrophil count.  
Infection sources compared using Fishers Exact test.

**Table S4.** Multivariable Models for In-Hospital All-Cause Mortality in Overall Cohort

|                        | aOR (95% CI)         | <i>P</i> |
|------------------------|----------------------|----------|
| <b>Model 1</b>         |                      |          |
| TOT                    | 1.001 (0.996-1.005)  | 0.708    |
| <b>Model 2</b>         |                      |          |
| Post-Implementation    | 0.254 (0.089-0.724)  | 0.010    |
| Age                    | 0.988 (0.961-1.015)  | 0.384    |
| <b>Model 3</b>         |                      |          |
| Post-Implementation    | 0.221 (0.075-0.647)  | 0.006    |
| Age                    | 0.988 (0.960-1.017)  | 0.412    |
| Sex                    | 0.398 (0.134-1.186)  | 0.098    |
| <b>Model 4</b>         |                      |          |
| Post-Implementation    | 0.219 (0.064-0.742)  | 0.015    |
| Age                    | 0.977 (0.943-1.012)  | 0.194    |
| Sex                    | 0.324 (0.090-1.170)  | 0.085    |
| PBS                    | 1.573 (1.243-1.989)  | <0.001   |
| <b>Model 5</b>         |                      |          |
| Post-Implementation    | 0.233 (0.064-0.842)  | 0.026    |
| Age                    | 0.974 (0.937-1.012)  | 0.180    |
| Sex                    | 0.281 (0.072-1.100)  | 0.068    |
| PBS                    | 1.765 (1.326-2.346)  | <0.001   |
| Neutropenic            | 5.786 (1.440-23.244) | 0.013    |
| <b>Model 6</b>         |                      |          |
| Post-Implementation    | 0.211 (0.060-0.741)  | 0.015    |
| Age                    | 0.981 (0.945-1.018)  | 0.298    |
| Sex                    | 0.319 (0.085-1.199)  | 0.091    |
| PBS                    | 1.682 (1.291-2.193)  | <0.001   |
| HSCT/Active malignancy | 2.787 (0.767-10.119) | 0.119    |
| <b>Model 7</b>         |                      |          |
| Post-Implementation    | 0.211 (0.061-0.732)  | 0.014    |
| Age                    | 0.301 (0.083-1.101)  | 0.070    |
| Sex                    | 0.980 (0.945-1.015)  | 0.259    |
| PBS                    | 1.433 (1.106-1.858)  | 0.007    |
| ICU admission          | 0.288 (0.049-1.676)  | 0.166    |

aOR: Adjusted odds ratio; CI: confidence interval; TOT: time to optimal therapy; PBS: Pitt bacteremia score; ICU: intensive care unit

**Table S5.** Models for In-Hospital All-Cause Mortality by Subgroups

|                                           | aOR (95% CI)         | <i>P</i> |
|-------------------------------------------|----------------------|----------|
| <b>Active Malignancy/Transplant, n=52</b> |                      |          |
| Post-implementation                       | 0.116 (0.014-0.952)  | 0.045    |
| Age                                       | 0.997 (0.920-1.038)  | 0.071    |
| Female                                    | 0.241 (0.028-2.037)  | 0.140    |
| PBS                                       | 1.879 (1.240-2.849)  | 0.002    |
| <b>HSCT, n=36</b>                         |                      |          |
| Post-implementation                       | 0.062 (0.004-0.880)  | 0.040    |
| Age                                       | 0.943 (0.867-1.024)  | 0.164    |
| Sex                                       | 0.301 (0.024-3.737)  | 0.350    |
| PBS                                       | 3.478 (1.095-3.320)  | 0.023    |
| <b>ICU Admission, n=64</b>                |                      |          |
| Post-implementation                       | 0.151 (0.037-0.620)  | 0.009    |
| Age                                       | 0.994 (0.955-1.035)  | 0.778    |
| Sex                                       | 0.194 (0.044-0.846)  | 0.029    |
| PBS                                       | 1.393 (1.058-1.835)  | 0.018    |
| <b>Neutropenic, n=32</b>                  |                      |          |
| Post-implementation                       | 0.070 (0.000-0.827)  | 0.041    |
| Age                                       | 0.870 (0.748-1.012)  | 0.071    |
| Sex                                       | 0.065 (0.002-2.456)  | 0.140    |
| PBS                                       | 3.478 (1.200-10.084) | 0.022    |

aOR: Adjusted odds ratio; CI: confidence interval; TOT: time to optimal therapy;

PBS: Pitt bacteremia score; ICU: intensive care unit. Models computed using logistic regression

**Table S6.** Cox Proportional Hazard Models for 30-day In-Hospital All-Cause Mortality

|                     | HR (95% CI)          | <i>P</i> |
|---------------------|----------------------|----------|
| <b>Model 1</b>      |                      |          |
| Post-implementation | 0.318 (0.124-0.814)  | 0.017    |
| Age                 | 0.996 (0.973-1.018)  | 0.697    |
| <b>Model 2</b>      |                      |          |
| Post-implementation | 0.292 (0.114-0.749)  | 0.010    |
| Age                 | 0.995 (0.972-1.018)  | 0.664    |
| Sex                 | 0.452 (0.176-1.163)  | 0.100    |
| <b>Model 3</b>      |                      |          |
| Post-implementation | 0.322 (0.124-1.831)  | 0.019    |
| Age                 | 0.996 (0.968-1.024)  | 0.759    |
| Sex                 | 0.472 (0.182-1.221)  | 0.122    |
| PBS< 3              | 6.669 (2.450-18.309) | <0.001   |

HR: Hazard ratio; CI: confidence interval; TOT: time to optimal therapy; PBS: Pitt bacteremia score

**Table S7.** Multivariable Models for In-Hospital All-Cause Mortality by Delayed Optimal Therapy

|                          | <b>aOR (95% CI)</b>   | <b><i>P</i></b> |
|--------------------------|-----------------------|-----------------|
| No early optimal therapy | 10.488 (2.497-44.050) | <0.001          |
| Age                      | 0.990 (0.932-1.009)   | 0.970           |
| Female                   | 0.266 (0.068-1.038)   | 0.057           |
| PBS                      | 1.806 (1.366-2.388)   | <0.001          |

aOR: Adjusted odds ratio; CI: confidence interval; PBS: Pitt bacteremia score; ICU: intensive care unit. Models computed using logistic regression. Early optimal status classified as time to optimal therapy from Gram-stain of less than 24 hours.
